# Supplementary material for: Comparison of Cancer Patients to Non-Cancer Patients among COVID-19 Inpatients at a National Level
Source: PubMed Central journal article supplement (PMC8004216; doi:10.3390/cancers13061436), 2021-03-21
Supplement: cancers-13-01436-s001.pdf [file cancers-13-01436-s001.pdf]

**Supplementary Material**
**Table S1.** ICD-10 codes used for identification of tumour subtypes.

| Tumour subtype                                      | ICD-10 codes             | Code wording                                                                                         |
|-----------------------------------------------------|--------------------------|------------------------------------------------------------------------------------------------------|
| Breast                                              | C50                      | Malignant neoplasm of breast                                                                         |
| Colorectal                                          | C18                      | Malignant neoplasm of colon                                                                          |
|                                                     | C19                      | Malignant neoplasm of rectosigmoid junction                                                          |
|                                                     | C20                      | Malignant neoplasm of rectum                                                                         |
|                                                     | C21                      | Malignant neoplasm of anus and anal canal                                                            |
| Prostate                                            | C61                      | Malignant neoplasm of prostate                                                                       |
| Lung                                                | C34                      | Malignant neoplasm of bronchus and lung                                                              |
| Digestive (non-colorectal)                          | C15-C26 (except C18-C21) | Malignant neoplasms of digestive organs                                                              |
| Urinary tract                                       | C64-C68                  | Malignant neoplasms of urinary tract                                                                 |
| Female genital organs                               | C51-C58                  | Malignant neoplasms of female genital organs                                                         |
| Lip, oral cavity and pharynx                        | C00-C14                  | Malignant neoplasms of lip, oral cavity and pharynx                                                  |
| Skin                                                | C43-C44                  | Melanoma and other malignant neoplasms of skin                                                       |
| Hematological                                       | C81-C96                  | Malignant neoplasms, stated or presumed to be primary, of lymphoid, hematopoietic and related tissue |
| Other cancers including Mesothelial and soft tissue | C45-C49                  | Malignant neoplasms of mesothelial and soft tissue                                                   |
| Respiratory and intrathoracic organs (not lung)     | C30-C39 (except C34)     | Malignant neoplasms of respiratory and intrathoracic organs                                          |
| Bone and articular cartilage                        | C40-C41                  | Malignant neoplasms of bone and articular cartilage                                                  |
| Endocrine glands                                    | C73-C75                  | Malignant neoplasms of thyroid and other endocrine glands                                            |
| Other male cancers                                  | C60                      | Malignant neoplasm of penis                                                                          |
|                                                     | C62                      | Malignant neoplasm of testis                                                                         |
|                                                     | C63                      | Malignant neoplasm of other and unspecified male genital organs                                      |
| Central nervous system                              | C69-C72                  | Malignant neoplasms of eye, brain and other parts of central nervous system                          |

**Table S2.** Main baseline characteristics of patients hospitalized in France for COVID-19 (from March 1st, 2020, to April 30th, 2020) according to the presence of cancer.

|                                 | Cancer               | Without cancer       | <i>p</i> -value |
|---------------------------------|----------------------|----------------------|-----------------|
| <b>Number of patients</b>       | 6,201                | 83,329               |                 |
| <b>Male gender (n, %)</b>       | 3,708 (59.8%)        | 43,787 (52.56%)      | <0.01           |
| <b>Age</b>                      |                      |                      | <0.01           |
| Mean+/-std                      | 72 +/- 13            | 65 +/- 20            |                 |
| Med [Q1-Q3]                     | 73 [64-82]           | 67 [51-81]           |                 |
| Min-Max                         | 1-100                | 0-106                |                 |
| <18                             | 23 (0.4)             | 1,204 (1.4)          |                 |
| 18-30                           | 46 (0.7)             | 4,338 (5.2)          |                 |
| 31-40                           | 82 (1.3)             | 5,983 (7.2)          |                 |
| 41-50                           | 227 (3.7)            | 8,665 (10.4)         |                 |
| 51-60                           | 694 (11.2)           | 12,416 (14.9)        |                 |
| 61-70                           | 1,457 (23.5)         | 13,888 (16.7)        |                 |
| 71-80                           | 1,791 (28.9)         | 14,474 (17.4)        |                 |
| 81-90                           | 1,534 (24.7)         | 16,307 (19.6)        |                 |
| >90                             | 347 (5.6)            | 6,054 (7.3)          |                 |
| <b>Social deprivation score</b> |                      |                      |                 |
| Mean+/-std                      | -0.44 +/- 1.78       | -0.26 +/- 1.78       | <0.01           |
| Med [Q1-Q3]                     | -0.21 [-1.40 - 0.77] | -0.14 [-1.22 - 0.93] |                 |
| Lowest                          | 1,634 (27.5)         | 19,720 (24.9)        | <0.01           |
| Second                          | 1,455 (24.5)         | 19,119 (24.1)        |                 |

|                               |               |                |       |
|-------------------------------|---------------|----------------|-------|
| Third                         | 1,531 (25.8)  | 20,437 (25.8)  |       |
| Highest                       | 1,317 (22.2)  | 19,969 (25.2)  |       |
| <b>Comorbidities</b>          |               |                |       |
| Hypertension                  | 2,216 (35.7)  | 27,406 (32.9)  | <0.01 |
| Dementia                      | 381 (6.1)     | 6,361 (7.6)    | <0.01 |
| HIV                           | 32 (0.5)      | 400 (0.5)      | 0.69  |
| Heart failure                 | 581 (9.4)     | 6,553 (7.9)    | <0.01 |
| Chronic respiratory disease   | 120 (1.9)     | 1,313 (1.6)    | 0.03  |
| Chronic kidney disease        | 620 (10.0)    | 6,838 (8.2)    | <0.01 |
| Cirrhosis                     | 134 (2.2)     | 584 (0.7)      | <0.01 |
| Diabetes                      | 1,209 (19.5)  | 15,841 (19.0)  | 0.35  |
| Hypertension                  | 2,192 (36.13) | 27,430 (32.86) | <0.01 |
| Peripheral vascular disease   | 298 (4.8)     | 2,572 (3.1)    | <0.01 |
| Obese or overweight           | 425 (6.9)     | 9,691 (11.6)   | <0.01 |
| Obese                         | 354 (5.7)     | 8,257 (9.9)    | <0.01 |
| Dyslipidemia                  | 386 (6.2)     | 4,103 (4.9)    | <0.01 |
| Deficiency Anemia             | 339 (5.5)     | 3,162 (3.8)    | <0.01 |
| BPCO                          | 481 (7.8)     | 4,385 (5.3)    | <0.01 |
| Pulmonary bacterial infection | 441 (7.1)     | 5,845 (7.0)    | 0.77  |

**Table S3.** Percentage of tumour subtypes among cancer patients hospitalized in France for COVID-19 (from March 1<sup>st</sup>, 2020, to April 30<sup>th</sup>, 2020) according to age.

|                              | <18  | 18-30 | 31-40 | 41-50 | 51-60 | 61-70 | 71-80 | 81-90 | >90  |
|------------------------------|------|-------|-------|-------|-------|-------|-------|-------|------|
| N                            | 23   | 42    | 78    | 215   | 652   | 1328  | 1657  | 1403  | 324  |
| Hematological                | 47.8 | 47.6  | 26.9  | 24.7  | 20.3  | 22.2  | 24.4  | 27.4  | 21   |
| Lung                         | 0    | 4.8   | 6.4   | 13.5  | 19.3  | 21.4  | 16.7  | 9.4   | 5.9  |
| Digestive (non-colorectal)   | 0    | 9.5   | 5.1   | 10.2  | 12.7  | 13    | 12.1  | 8.1   | 8.3  |
| Prostate                     | 0    | 0     | 0     | 1.9   | 3.4   | 6.8   | 11.8  | 17.8  | 18.5 |
| Breast                       | 0    | 2.4   | 25.6  | 21.9  | 13.5  | 8.8   | 7.2   | 8.6   | 14.8 |
| Colorectal                   | 0    | 7.1   | 12.8  | 5.6   | 7.8   | 8.8   | 9     | 9.4   | 13.9 |
| Urinary tract                | 8.7  | 0     | 2.6   | 4.7   | 5.5   | 4.7   | 6.7   | 8.6   | 6.2  |
| Other cancers                | 39.1 | 26.2  | 10.3  | 9.3   | 6.6   | 5.6   | 4.6   | 3.8   | 2.8  |
| Female genital organs        | 4.4  | 2.4   | 3.9   | 3.7   | 3.7   | 3.2   | 3.4   | 3.1   | 1.2  |
| Lip, oral cavity and pharynx | 0    | 0     | 3.9   | 1.9   | 6.1   | 4.5   | 2.6   | 0.8   | 0.3  |
| Skin                         | 0    | 0     | 2.6   | 2.8   | 1.2   | 1.1   | 1.6   | 3     | 7.1  |

**Table S4.** Complications and main outcomes of patients hospitalized in France for COVID-19 (from March 1<sup>st</sup>, 2020, to April 30<sup>th</sup>, 2020) according to the presence of cancer.

|                                                  | Cancer       | Without cancer | p-value |
|--------------------------------------------------|--------------|----------------|---------|
| <b>Number of patients</b>                        | 6,201        | 83,329         |         |
| Acute respiratory failure                        | 1,881 (30.3) | 22,436 (26.9)  | <0.01   |
| Pulmonary embolism                               | 273 (4.4)    | 2,813 (3.4)    | <0.01   |
| Venous thrombosis (including pulmonary embolism) | 379 (6.1)    | 3,988 (4.8)    | <0.01   |
| Septic shock                                     | 195 (3.1)    | 2,356 (2.8)    | 0.15    |
| Myocardial infarction                            | 27 (0.4)     | 531 (0.6)      | 0.05    |
| Atrial fibrillation                              | 974 (15.7)   | 10,155 (12.2)  | <0.01   |
| Stroke                                           | 71 (1.1)     | 997 (1.2)      | 0.72    |
| Hemorrhagic stroke                               | 19 (0.3)     | 234 (0.3)      | 0.71    |
| Ischemic stroke                                  | 40 (0.7)     | 674 (0.8)      | 0.16    |
| Transient Ischemic Attack                        | 15 (0.2)     | 146 (0.2)      | 0.23    |
| Acute kidney failure                             | 503 (8.1)    | 5,258 (6.3)    | <0.01   |
| Intensive care support                           | 930 (15.0)   | 13,655 (16.4)  | <0.01   |
| In-hospital death                                | 2,047 (33.0) | 13,057 (15.7)  | <0.01   |

**Table S5.** Intensive care support and case fatality rates of patients hospitalized in France for COVID-19 (from March 1<sup>st</sup>, 2020, to April 30<sup>th</sup>, 2020) according to the presence of cancer and according to age.

| <b>Cancer</b>              |               |              |              |              |              |              |              |              |               |
|----------------------------|---------------|--------------|--------------|--------------|--------------|--------------|--------------|--------------|---------------|
| <b>Age strata (years)</b>  | <b>&lt;18</b> | <b>18-30</b> | <b>31-40</b> | <b>41-50</b> | <b>51-60</b> | <b>61-70</b> | <b>71-80</b> | <b>81-90</b> | <b>&gt;90</b> |
| Number                     | 23            | 46           | 82           | 227          | 694          | 1,457        | 1,791        | 1,534        | 347           |
| Intensive care support (%) | 21.7 *        | 26.1 *       | 19.5 *       | 15.9         | 20.9         | 20.9 \$      | 17.5 \$      | 5.8          | 2.6           |
| In-hospital death (%)      | 8.7 *         | 8.7 *        | 9.8 *        | 22.5 *       | 23.1 *       | 28.9 *       | 35.0 *       | 40.7 *       | 43.5 *        |
| <b>Without cancer</b>      |               |              |              |              |              |              |              |              |               |
| <b>Age strata (years)</b>  | <b>&lt;18</b> | <b>18-30</b> | <b>31-40</b> | <b>41-50</b> | <b>51-60</b> | <b>61-70</b> | <b>71-80</b> | <b>81-90</b> | <b>&gt;90</b> |
| Number                     | 1,204         | 4,338        | 5,983        | 8,665        | 12,416       | 13,888       | 14,474       | 16,307       | 6,054         |
| Intensive care support (%) | 2.6 *         | 5.7 *        | 10.2 *       | 15.9         | 23.4         | 28.9 \$      | 22.2 \$      | 6.6          | 2.9           |
| In-hospital death (%)      | 0.6 *         | 0.4 *        | 1.3 *        | 2.2 *        | 5.1 *        | 12.1 *       | 21.6 *       | 31.6 *       | 35.9 *        |

\* significantly higher in the cancer group compared to the non-cancer group ( $p < 0.05$ ); \$ significantly lower in the cancer group compared to the non-cancer group ( $p < 0.05$ )

**Table S6.** Hierarchical logistic regression to study the risk of in-hospital death regarding patients hospitalized in France for COVID-19 (from March 1st, 2020, to April 30th, 2020) with cancer or not.

|                                 | <b>Death</b> | <b>Hospital mortality rate</b> | <b>aOR *</b>  | <b>p-value</b> | <b>aOR **</b> | <b>p-value</b> |
|---------------------------------|--------------|--------------------------------|---------------|----------------|---------------|----------------|
| Cancer                          | 2,047        | 33.0                           | 2.7 [2.5-2.8] | <0.01          | 2.2 [2.0-2.3] | <0.01          |
| Without cancer                  | 13,057       | 15.7                           | ref           |                | ref           |                |
| Solid Cancer with metastasis    | 693          | 39.0                           | 3.4 [3.1-3.8] | <0.01          | 3.6 [3.2-4.0] | <0.01          |
| Solid Cancer without metastasis | 690          | 27.0                           | 2.0 [1.8-2.2] | <0.01          | 1.4 [1.3-1.5] | <0.01          |
| Hematological cancer            | 470          | 33.8                           | 2.8 [2.5-3.1] | <0.01          | 2.2 [2.0-2.5] | <0.01          |
| Without cancer                  | 13,057       | 15.7                           | ref           |                | ref           |                |

aOR: adjusted odds ratio; \*Hierarchical model using hospitals as the 2nd level, adjusted odds ratio on sex, dementia, heart failure, chronic respiratory disease, cirrhosis, diabetes, deficiency anemia and pulmonary bacterial infection;

\*\*Hierarchical model using geographical unit as the 2nd level, adjusted odds ratio on sex, dementia, heart failure, chronic respiratory disease, cirrhosis, diabetes, deficiency anemia and pulmonary bacterial infection

**Table 7.** Hierarchical Logistic regression to study the risk of hospital death among cancer patients hospitalized in France for COVID-19 (from March 1st, 2020, to April 30th, 2020), using colorectal cancers as the reference group.

|                                     | <b>N</b> | <b>Death</b> | <b>Hospital mortality rate</b> | <b>aOR *</b>  | <b>p-value</b> | <b>aOR **</b> | <b>p-value</b> |
|-------------------------------------|----------|--------------|--------------------------------|---------------|----------------|---------------|----------------|
| <b>All cancer</b>                   |          |              |                                |               |                |               |                |
| Colorectal                          | 518      | 142          | 27.4                           | ref           | -              | ref           | -              |
| Digestive (non-colorectal)          | 626      | 233          | 37.2                           | 1.6 [1.2-2.0] | <0.01          | 1.6 [1.3-2.1] | <0.01          |
| Breast                              | 561      | 133          | 23.7                           | 0.8 [0.6-1.1] | 0.16           | 1.0 [0.8-1.4] | 0.76           |
| Prostate                            | 621      | 188          | 30.3                           | 1.2 [0.9-1.5] | 0.29           | 0.9 [0.7-1.2] | 0.36           |
| Lung                                | 873      | 359          | 41.1                           | 1.8 [1.5-2.3] | <0.01          | 2.0 [1.6-2.6] | <0.01          |
| Urinary tract                       | 363      | 122          | 33.6                           | 1.3 [1.0-1.8] | 0.049          | 1.2 [0.9-1.7] | 0.15           |
| Female genital organs               | 185      | 54           | 29.2                           | 1.1 [0.8-1.6] | 0.64           | 1.4 [0.9-2.1] | 0.07           |
| Lip, oral cavity and pharynx        | 162      | 38           | 23.5                           | 0.8 [0.5-1.2] | 0.32           | 0.9 [0.6-1.4] | 0.73           |
| Skin                                | 121      | 32           | 26.5                           | 1.0 [0.6-1.5] | 0.83           | 0.8 [0.5-1.3] | 0.44           |
| Other cancers***                    | 303      | 82           | 27.1                           | 1.0 [0.7-1.3] | 0.91           | 1.2 [0.8-1.6] | 0.37           |
| Hematological                       | 1389     | 470          | 33.8                           | 1.4 [1.1-1.7] | 0.01           | 1.4 [1.1-1.8] | <0.01          |
| <b>Solid Cancer with metastasis</b> |          |              |                                |               |                |               |                |
| Colorectal                          | 244      | 84           | 34.4                           | ref           | -              | ref           | -              |
| Digestive (non-colorectal)          | 244      | 109          | 44.7                           | 1.5 [1.1-2.2] | 0.02           | 1.6 [1.1-2.3] | 0.02           |
| Breast                              | 241      | 77           | 32.0                           | 0.9 [0.6-1.3] | 0.56           | 1.1 [0.8-1.7] | 0.52           |
| Prostate                            | 196      | 74           | 37.8                           | 1.2 [0.8-1.7] | 0.47           | 0.9 [0.6-1.3] | 0.73           |
| Lung                                | 461      | 215          | 46.6                           | 1.7 [1.2-2.3] | <0.01          | 1.7 [1.2-2.4] | <0.01          |
| Urinary tract                       | 128      | 54           | 42.2                           | 1.4 [0.9-2.2] | 0.14           | 1.4 [0.9-2.1] | 0.15           |
| Female genital organs               | 119      | 41           | 34.5                           | 1.0 [0.6-1.6] | 0.99           | 1.2 [0.7-2.0] | 0.44           |

|                                        |     |     |      |               |       |               |       |
|----------------------------------------|-----|-----|------|---------------|-------|---------------|-------|
| Lip, oral cavity and pharynx           | 45  | 12  | 26.7 | 0.7 [0.3-1.4] | 0.31  | 0.7 [0.4-1.5] | 0.37  |
| Skin                                   | 43  | 12  | 27.9 | 0.7 [0.4-1.5] | 0.41  | 0.7 [0.4-1.5] | 0.41  |
| Other cancers***                       | 54  | 15  | 27.8 | 0.7 [0.4-1.4] | 0.35  | 0.8 [0.4-1.6] | 0.53  |
| <b>Solid Cancer without metastasis</b> |     |     |      |               |       |               |       |
| Colorectal                             | 274 | 58  | 21.2 | ref           | -     | ref           | -     |
| Digestive (non-colorectal)             | 382 | 124 | 32.5 | 1.8 [1.2-2.6] | <0.01 | 2.0 [1.3-3.0] | <0.01 |
| Breast                                 | 320 | 56  | 17.5 | 0.8 [0.5-1.2] | 0.26  | 1.1 [0.7-1.7] | 0.63  |
| Prostate                               | 425 | 114 | 26.8 | 1.4 [0.9-2.0] | 0.09  | 1.0 [0.7-1.4] | 0.93  |
| Lung                                   | 412 | 144 | 35.0 | 2.0 [1.4-2.9] | <0.01 | 2.4 [1.7-3.5] | <0.01 |
| Urinary tract                          | 235 | 68  | 28.9 | 1.5 [1.0-2.3] | 0.04  | 1.3 [0.9-2.0] | 0.20  |
| Female genital organs                  | 66  | 13  | 19.7 | 0.9 [0.5-1.8] | 0.79  | 1.4 [0.7-2.9] | 0.32  |
| Lip, oral cavity and pharynx           | 117 | 26  | 22.2 | 1.1 [0.6-1.8] | 0.82  | 1.5 [0.9-2.6] | 0.12  |
| Skin                                   | 78  | 20  | 25.6 | 1.3 [0.7-2.3] | 0.40  | 1.0 [0.5-1.8] | 0.91  |
| Other cancers***                       | 249 | 67  | 26.9 | 1.4 [0.9-2.1] | 0.13  | 2.0 [1.3-3.0] | <0.01 |

aOR: adjusted odds ratio; \*Hierarchical model using hospitals as the 2nd level, adjusted odds ratio on sex, dementia, heart failure, chronic respiratory disease, cirrhosis, diabetes, deficiency anemia and pulmonary bacterial infection; \*\*Hierarchical model using geographical unit as the 2nd level, adjusted odds ratio on sex, dementia, heart failure, chronic respiratory disease, cirrhosis, diabetes, deficiency anemia and pulmonary bacterial infection; \*\*\* including mesothelial and soft issue, respiratory and intrathoracic organs (except lung), bone and articular cartilage, endocrine glands, other male cancers and central nervous system

**Table S8.** Tumour subtypes for cancer patients (with or without metastasis) hospitalized in France for COVID-19 (from March 14th, 2020, to April 30th, 2020).

|                              | All cancer<br>n=5,348 |      | Solid Metastatic cancer<br>n=1,624 |      | Solid Cancer without metastasis<br>n=2,413 |      |
|------------------------------|-----------------------|------|------------------------------------|------|--------------------------------------------|------|
|                              | n                     | %    | n                                  | %    | n                                          | %    |
| Hematological                | 1,311                 | 24.5 | -                                  | -    | -                                          | -    |
| Lung                         | 794                   | 14.8 | 404                                | 24.9 | 390                                        | 16.2 |
| Digestive (non-colorectal)   | 583                   | 10.9 | 227                                | 14.0 | 356                                        | 14.8 |
| Prostate                     | 587                   | 11.0 | 183                                | 11.3 | 404                                        | 16.7 |
| Breast                       | 526                   | 9.8  | 220                                | 13.6 | 306                                        | 12.7 |
| Colorectal                   | 487                   | 9.1  | 229                                | 14.1 | 258                                        | 10.7 |
| Urinary tract                | 340                   | 6.4  | 118                                | 7.3  | 222                                        | 9.2  |
| Other cancers*               | 283                   | 5.3  | 49                                 | 3.0  | 234                                        | 9.7  |
| Female genital organs        | 173                   | 3.2  | 112                                | 6.9  | 61                                         | 2.5  |
| Lip, oral cavity and pharynx | 153                   | 2.9  | 44                                 | 2.7  | 109                                        | 4.5  |
| Skin                         | 111                   | 2.1  | 38                                 | 2.3  | 73                                         | 3.0  |

\* including mesothelial and soft issue, respiratory and intrathoracic organs (except lung), bone and articular cartilage, endocrine glands, other male cancers and central nervous system

**Table S9.** Main baseline characteristics of patients hospitalized in France for COVID-19 (from March 14th, 2020, to April 30th, 2020) according to the presence of cancer (with or without metastasis) and cancer types.

|                                 | Hematological cancer | Solid Metastatic cancer | Solid Cancer without metastasis | Without cancer | p-value* |
|---------------------------------|----------------------|-------------------------|---------------------------------|----------------|----------|
| <b>Number of patients</b>       | 1,311                | 1,624                   | 2,413                           | 79,650         |          |
| <b>Male gender (n, %)</b>       | 762 (58.1)**         | 909 (56.0)**            | 1,541 (63.9)**                  | 41,867 (52.6)  | <0.01    |
| <b>Age</b>                      |                      |                         |                                 |                | <0.01    |
| Mean+/-std                      | 72 +/- 15**          | 70 +/- 13**             | 74 +/- 13**                     | 65 +/- 20      |          |
| Med [Q1-Q3]                     | 74 [64-83]           | 71 [62-80]              | 75 [66-84]                      | 67 [51-81]     |          |
| <b>Social deprivation score</b> |                      |                         |                                 |                |          |
| Mean+/-std                      | -0.43 +/- 1.83 §     | -0.42 +/- 1.72 §        | -0.44 +/- 1.79 §                | -0.25 +/- 1.78 | <0.01    |

|                                |                         |                                   |                                   |                      |       |
|--------------------------------|-------------------------|-----------------------------------|-----------------------------------|----------------------|-------|
| Med [Q1-Q3]                    | -0,17 [-1,41 - 0,86]    | -0,19 [-1,38 - 0,76] <sup>§</sup> | -0,21 [-1,39 - 0,77] <sup>§</sup> | -0,13 [-1,22 - 0,93] |       |
| Lowest (<-1.233)               | 341 (27.2)**            | 431 (27.6)**                      | 625 (27.0)**                      | 18,819 (24.8)        | <0.01 |
| Second ([-1.23;-0.145])        | 301 (24.0)              | 388 (24.8)                        | 607 (26.3)                        | 18,921 (25.0)        |       |
| Third ([-0.145;-0.928])        | 328 (26.2)              | 419 (26.8)                        | 589 (25.5)                        | 19,247 (25.4)        |       |
| Highest (≥0.928)               | 282 (22.5) <sup>§</sup> | 324 (20.7) <sup>§</sup>           | 491 (21.2) <sup>§</sup>           | 18,818 (24.8)        |       |
| <b>Hospital type admission</b> |                         |                                   |                                   |                      |       |
| Public                         | 1,215 (92.7)**          | 1,364 (84.0) <sup>§</sup>         | 2,128 (88.2)                      | 70,844 (88.9)        | <0.01 |
| Private                        | 96 (7.3) <sup>§</sup>   | 260 (16.0) **                     | 285 (11.8)                        | 8,806 (11.1)         |       |
| <b>Comorbidities</b>           |                         |                                   |                                   |                      |       |
| Hypertension                   | 483 (36.8)**            | 461 (28.4) <sup>§</sup>           | 952 (39.5)**                      | 26,267 (33.0)        | <0.01 |
| Dementia                       | 75 (5.7) <sup>§</sup>   | 55 (3.4) <sup>§</sup>             | 200 (8.3)                         | 6,101 (7.7)          | <0.01 |
| HIV                            | 8 (0.6)                 | 5 (0.3)                           | 15 (0.6)                          | 390 (0.5)            | 0.37  |
| Heart failure                  | 148 (11.3)**            | 112 (6.9)                         | 226 (9.4)**                       | 6,155 (7.7)          | 0.01  |
| Chronic respiratory disease    | 21 (1.6)                | 33 (2.0)                          | 46 (1.9)                          | 1,234 (1.6)          | 0.12  |
| Chronic kidney disease         | 151 (11.5)**            | 93 (5.7) <sup>§</sup>             | 283 (11.7)**                      | 6,421 (8.1)          | <0.01 |
| Cirrhosis                      | 10 (0.8)                | 22 (1.4)**                        | 87 (3.6)**                        | 554 (0.7)            | <0.01 |
| Diabetes                       | 224 (17.1)              | 272 (16.8) <sup>§</sup>           | 549 (22.8)**                      | 15,171 (19.1)        | <0.01 |
| Peripheral vascular disease    | 43 (3.3)                | 60 (3.7)                          | 152 (6.3)**                       | 2,430 (3.1)          | <0.01 |
| Obese or overweight            | 125 (9.5) <sup>§</sup>  | 65 (4.0) <sup>§</sup>             | 194 (8.0) <sup>§</sup>            | 9,360 (11.8)         | <0.01 |
| Obese                          | 101 (7.7) <sup>§</sup>  | 58 (3.6) <sup>§</sup>             | 159 (6.6) <sup>§</sup>            | 7,971 (10.0)         | <0.01 |
| Dyslipidemia                   | 91 (6.9)**              | 67 (4.1)                          | 164 (6.8)**                       | 3,903 (4.9)          | <0.01 |
| Deficiency Anemia              | 75 (5.7)**              | 61 (3.8)                          | 143 (5.9)**                       | 2,974 (3.7)          | <0.01 |
| COPD                           | 61 (4.7)                | 104 (6.4)**                       | 229 (9.5)**                       | 4,122 (5.2)          | <0.01 |
| Pulmonary bacterial infection  | 123 (9.4)**             | 85 (5.2) <sup>§</sup>             | 161 (6.7)                         | 5,480 (6.9)          | 0.03  |
| <b>Complications</b>           |                         |                                   |                                   |                      |       |
| Acute respiratory failure      | 445 (33.9)**            | 467 (28.8)                        | 708 (29.3)**                      | 21,303 (26.8)        | <0.01 |
| Pulmonary embolism             | 55 (4.2)                | 79 (4.9)**                        | 97 (4.0)                          | 2,734 (3.4)          | <0.01 |
| Venous thrombosis              | 81 (6.2)**              | 106 (6.5)**                       | 134 (5.6)                         | 3,859 (4.8)          | <0.01 |
| Septic shock                   | 66 (5.0)**              | 24 (1.5) <sup>§</sup>             | 76 (3.2)                          | 2,170 (2.7)          | <0.01 |
| Myocardial infarction          | 10 (0.8)                | 2 (0.1) <sup>§</sup>              | 11 (0.5)                          | 496 (0.6)            | 0.02  |
| Atrial fibrillation            | 226 (17.2)**            | 198 (12.2)                        | 409 (17.0)**                      | 9,649 (12.1)         | <0.01 |
| Stroke                         | 11 (0.8)                | 15 (0.9)                          | 34 (1.4)                          | 936 (1.2)            | 0.37  |
| Hemorrhagic stroke             | 5 (0.4)                 | 6 (0.4)                           | 6 (0.3)                           | 226 (0.3)            | 0.77  |
| Ischemic stroke                | 5 (0.4)                 | 6 (0.4)                           | 22 (0.9)                          | 630 (0.8)            | 0.13  |
| Transient Ischemic Attack      | 1 (0.1)                 | 5 (0.3)                           | 6 (0.3)                           | 134 (0.2)            | 0.27  |
| Acute kidney failure           | 142 (10.8)**            | 90 (5.5)                          | 187 (7.8)*                        | 4,887 (6.1)          | <0.01 |
| Intensive care support         | 320 (24.4)**            | 137 (8.4) <sup>§</sup>            | 332 (13.8) <sup>§</sup>           | 12,888 (16.2)        | <0.01 |
| In-hospital death              | 428 (32.7)**            | 605 (37.3)**                      | 635 (26.3)**                      | 12,251 (15.4)        | <0.01 |

\* *p*-value related to the comparison of the three groups (solid metastatic cancer, solid cancer without metastasis and without cancer); \*\* significantly higher in the cancer group compared to the non-cancer group (*p* < 0.05); § significantly lower in the cancer group compared to the non-cancer group (*p* < 0.05)

**Table S10.** Logistic regression to study the risk of transfer to intensive care unit (adjusted odds ratio) regarding patients hospitalized in France for COVID-19 (from March 14th, 2020, to April 30th, 2020) with cancer or not.

|                                 | <40             | 41-50         | 51-80         | 81-90         | >90           |
|---------------------------------|-----------------|---------------|---------------|---------------|---------------|
| Cancer                          | 3.8 [2.4-6.1]   | 1.1 [0.8-1.7] | 0.7 [0.6-0.8] | 0.8 [0.6-0.9] | 0.8 [0.4-1.7] |
| Without cancer                  | ref             | ref           | ref           | ref           | ref           |
| Solid Cancer with metastasis    | 1.6 [0.6-4.3]   | 0.7 [0.3-1.6] | 0.4 [0.3-0.4] | 0.2 [0.1-0.6] | 0.7 [0.1-4.8] |
| Solid Cancer without metastasis | 1.9 [0.7-5.3]   | 0.6 [0.2-1.4] | 0.7 [0.6-0.8] | 0.9 [0.6-1.2] | 1.1 [0.5-2.5] |
| Without cancer                  | ref             | ref           | ref           | ref           | ref           |
| Hematological cancer            | 10.6 [5.5-20.3] | 3.3 [1.8-6.2] | 1.5 [1.3-1.8] | 1.1 [0.7-1.6] | 0.6 [0.1-4.3] |

Adjusted odds ratio on sex, dementia, heart failure, chronic respiratory disease, cirrhosis, diabetes, deficiency anemia and pulmonary bacterial infection

**Table S11.** Logistic regression to study the risk of in-hospital death regarding patients hospitalized in France for COVID-19 (from March 14th, 2020, to April 30th, 2020) with cancer or not.

|                                 | Death  | Hospital mortality rate | OR            | p-value | aOR *         | p-value |
|---------------------------------|--------|-------------------------|---------------|---------|---------------|---------|
| Cancer                          | 1,668  | 31.2                    | 2.6 [2.4-2.7] | <0.01   | 2.1 [1.9-2.2] | <0.01   |
| Without cancer                  | 12,251 | 15.4                    | ref           |         | ref           |         |
| Solid Cancer with metastasis    | 605    | 37.3                    | 3.3 [2.9-3.6] | <0.01   | 3.4 [3.0-3.8] | <0.01   |
| Solid Cancer without metastasis | 635    | 26.3                    | 2.0 [1.8-2.2] | <0.01   | 1.4 [1.2-1.5] | <0.01   |
| Without cancer                  | 12,251 | 15.4                    | ref           |         | ref           |         |
| Hematological cancer            | 428    | 32.7                    | 2.7 [2.4-3.0] | <0.01   | 2.1 [1.9-2.4] | <0.01   |

OR: odds ratio ; aOR: adjusted odds ratio; \*Adjusted odds ratio on sex, dementia, heart failure, chronic respiratory disease, cirrhosis, diabetes, deficiency anemia and pulmonary bacterial infection

**Table S12.** Logistic regression to study the risk of hospital death among cancer patients hospitalized in France for COVID-19 (from March 14th, 2020, to April 30th, 2020), using colorectal cancers as the reference group.

|                                        | N    | Death | Hospital mortality rate | OR            | p-value | aOR *         | p-value |
|----------------------------------------|------|-------|-------------------------|---------------|---------|---------------|---------|
| <b>All cancer</b>                      |      |       |                         |               |         |               |         |
| Colorectal                             | 487  | 128   | 26.3                    | ref           | -       | ref           | -       |
| Digestive (non-colorectal)             | 583  | 214   | 36.7                    | 1.6 [1.3-2.1] | <0.01   | 1.7 [1.3-2.2] | <0.01   |
| Breast                                 | 526  | 120   | 22.8                    | 0.8 [0.6-1.1] | 0.20    | 1.0 [0.8-1.4] | 0.79    |
| Prostate                               | 587  | 177   | 30.2                    | 1.2 [0.9-1.6] | 0.16    | 0.9 [0.7-1.2] | 0.56    |
| Lung                                   | 794  | 307   | 38.7                    | 1.8 [1.4-2.3] | <0.01   | 1.9 [1.5-2.5] | <0.01   |
| Urinary tract                          | 340  | 110   | 32.4                    | 1.3 [1.0-1.8] | 0.06    | 1.2 [0.9-1.7] | 0.19    |
| Female genital organs                  | 173  | 47    | 27.2                    | 1.0 [0.7-1.5] | 0.82    | 1.3 [0.9-2.0] | 0.16    |
| Lip, oral cavity and pharynx           | 153  | 35    | 22.9                    | 0.8 [0.5-1.3] | 0.40    | 1.0 [0.6-1.5] | 0.90    |
| Skin                                   | 111  | 27    | 24.3                    | 0.9 [0.6-1.5] | 0.67    | 0.8 [0.5-1.3] | 0.32    |
| Other cancers**                        | 283  | 75    | 26.5                    | 1.0 [0.7-1.4] | 0.95    | 1.2 [0.9-1.7] | 0.30    |
| Hematological                          | 1311 | 428   | 32.7                    | 1.4 [1.1-1.7] | 0.01    | 1.4 [1.1-1.8] | 0.01    |
| <b>Solid Cancer with metastasis</b>    |      |       |                         |               |         |               |         |
| Colorectal                             | 229  | 75    | 32.8                    | ref           | -       | ref           | -       |
| Digestive (non-colorectal)             | 227  | 100   | 44.1                    | 1.6 [1.1-2.4] | 0.01    | 1.7 [1.1-2.5] | 0.01    |
| Breast                                 | 220  | 67    | 30.5                    | 0.9 [0.6-1.3] | 0.60    | 1.0 [0.7-1.5] | 0.90    |
| Prostate                               | 183  | 70    | 38.3                    | 1.3 [0.8-1.9] | 0.25    | 1.1 [0.8-1.7] | 0.55    |
| Lung                                   | 404  | 173   | 42.8                    | 1.5 [1.1-2.2] | 0.01    | 1.6 [1.1-2.2] | 0.01    |
| Urinary tract                          | 118  | 48    | 40.7                    | 1.4 [0.9-2.2] | 0.14    | 1.4 [0.9-2.2] | 0.15    |
| Female genital organs                  | 112  | 37    | 33.0                    | 1.0 [0.6-1.6] | 0.96    | 1.0 [0.6-1.6] | 0.97    |
| Lip, oral cavity and pharynx           | 44   | 11    | 25.0                    | 0.7 [0.3-1.4] | 0.31    | 0.7 [0.3-1.5] | 0.39    |
| Skin                                   | 38   | 11    | 29.0                    | 0.8 [0.4-1.8] | 0.64    | 0.9 [0.4-1.9] | 0.73    |
| Other cancers**                        | 49   | 13    | 26.5                    | 0.7 [0.4-1.5] | 0.40    | 0.9 [0.4-1.8] | 0.71    |
| <b>Solid Cancer without metastasis</b> |      |       |                         |               |         |               |         |
| Colorectal                             | 258  | 53    | 20.5                    | ref           | -       | ref           | -       |
| Digestive (non-colorectal)             | 356  | 114   | 32.0                    | 1.8 [1.3-2.7] | <0.01   | 2.0 [1.4-3.0] | <0.01   |
| Breast                                 | 306  | 53    | 17.3                    | 0.8 [0.5-1.2] | 0.33    | 1.1 [0.7-1.8] | 0.61    |
| Prostate                               | 404  | 107   | 26.5                    | 1.4 [0.9-2.0] | 0.08    | 1.0 [0.7-1.5] | 0.95    |
| Lung                                   | 390  | 134   | 34.4                    | 2.0 [1.4-2.9] | <0.01   | 2.4 [1.6-3.6] | <0.01   |
| Urinary tract                          | 222  | 62    | 27.9                    | 1.5 [1.0-2.3] | 0.06    | 1.3 [0.9-2.0] | 0.22    |
| Female genital organs                  | 61   | 10    | 16.4                    | 0.8 [0.4-1.6] | 0.47    | 1.2 [0.5-2.6] | 0.67    |
| Lip, oral cavity and pharynx           | 109  | 24    | 22.0                    | 1.1 [0.6-1.9] | 0.75    | 1.5 [0.9-2.7] | 0.13    |
| Skin                                   | 73   | 16    | 21.9                    | 1.1 [0.6-2.0] | 0.80    | 0.8 [0.4-1.6] | 0.56    |
| Other cancers**                        | 234  | 62    | 26.5                    | 1.4 [0.9-2.1] | 0.12    | 2.0 [1.3-3.1] | <0.01   |

OR: odds ratio ; aOR: adjusted odds ratio; \* adjusted on age, sex, dementia, heart failure, chronic respiratory disease, cirrhosis, diabetes, deficiency anemia and pulmonary bacterial infection; \*\* including mesothelial and soft issue,

respiratory and intrathoracic organs (except lung), bone and articular cartilage, endocrine glands, other male cancers and central nervous system.

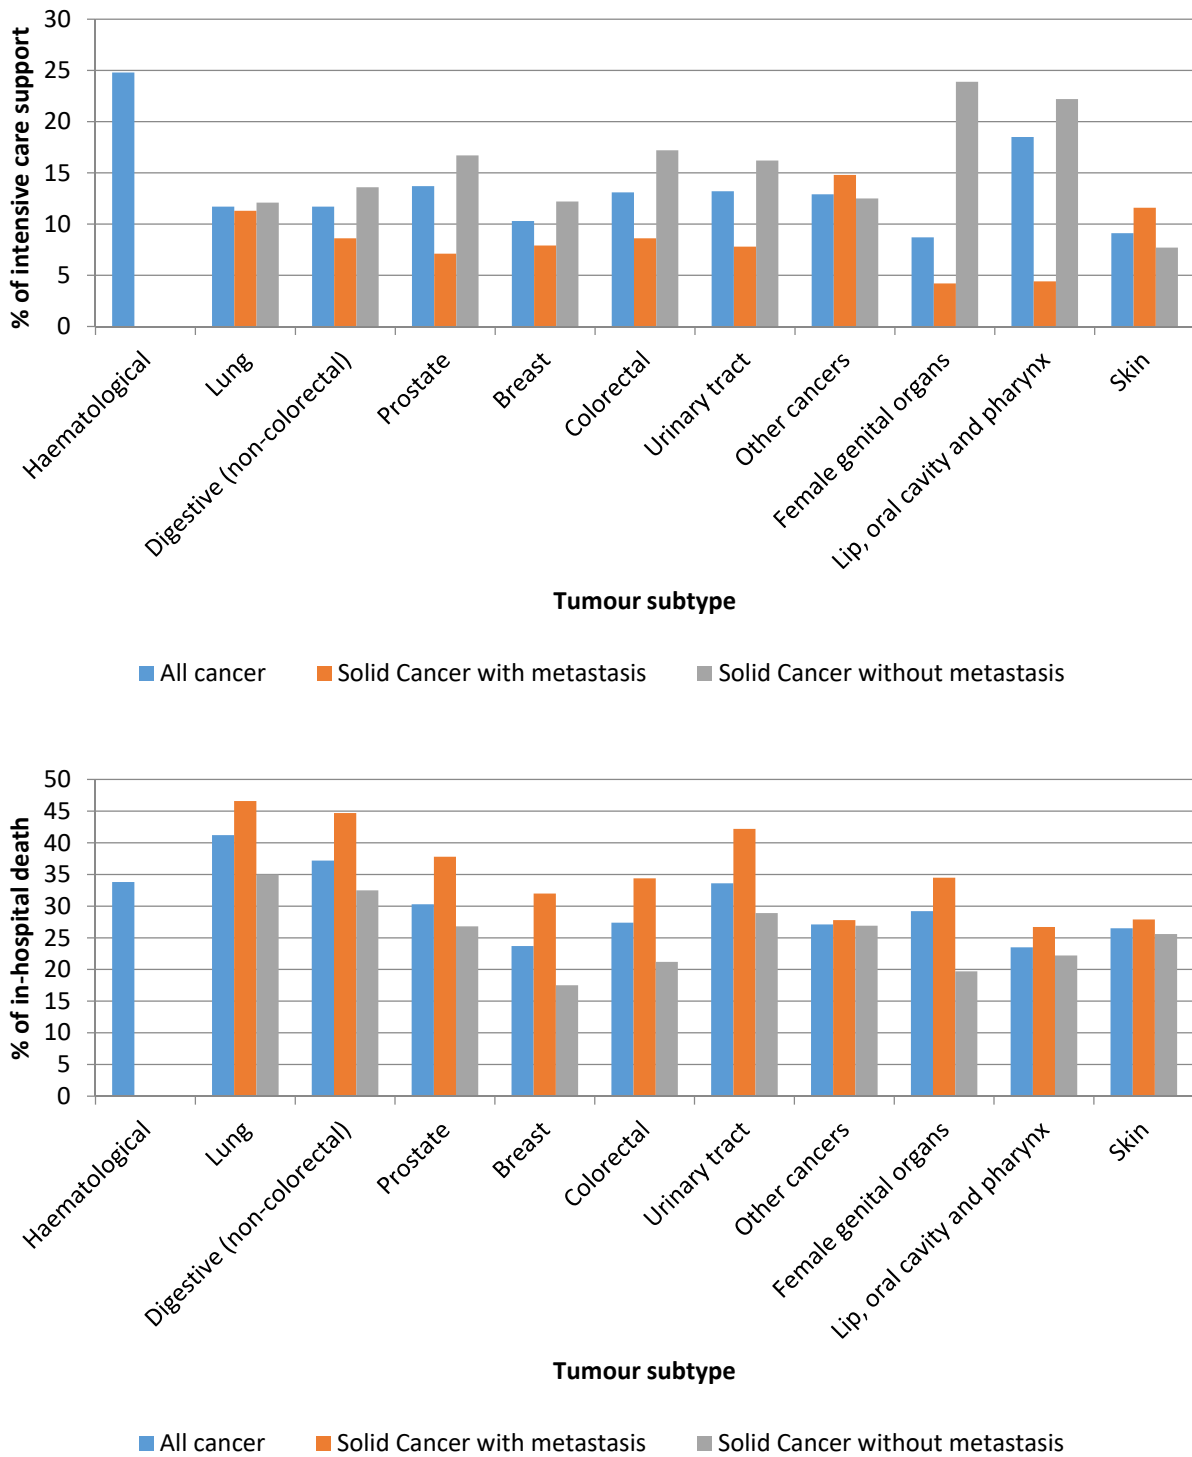

**Figure S1.** Intensive case support and case fatality rates of cancer patients (with or without metastasis) hospitalized in France for COVID-19 (from March 1<sup>st</sup>, 2020, to April 30<sup>th</sup>, 2020) according to tumour subtypes.
